# Supplementary material
Source: PubMed Central journal article supplement (PMC4345168)
Supplement: NIHMS629481-supplement-Supplemental_Figure_Legends_and_Table.pdf [file NIHMS629481-supplement-Supplemental_Figure_Legends_and_Table.pdf]

**Supplemental Figure 1: Cross-Sectional Association of BMI with Continuous hs-cTnT Levels in Linear Spline Model**

Adjusted for age, sex, race, smoking status, diabetes mellitus, hypertension, LDL-C, HDL-C, triglycerides, alcohol intake, NT-proBNP and estimated GFR

**Supplemental Figure 2. Prospective Association of Continuous hs-cTnT with Incident HF  
in Restricted Cubic Spline Model**

Adjusted for age, sex, race, smoking status, diabetes mellitus, hypertension, LDL-C, HDL-C,  
triglycerides, alcohol intake, NT-proBNP and estimated GFR

**Supplemental Table 1: Incidence Rates and Hazard Ratios for Incident HF Associated with Higher BMI and hs-cTnT Categories**

|                         |                    | Normal<br>Weight<br>(N=2,448) | Overweight<br>(N=3,800) | Obese<br>(N=2,118)  | Severely<br>Obese<br>(N=1,141) | p value<br>per 5-<br>point<br>higher<br>BMI |
|-------------------------|--------------------|-------------------------------|-------------------------|---------------------|--------------------------------|---------------------------------------------|
| Undetectable<br>hs-cTnT | Incidence<br>Rate* | 3.14                          | 3.16                    | 4.96                | 7.26                           | <0.001                                      |
|                         | HR+<br>(95% CI)    | 1.00<br>Reference             | 0.99<br>(0.64-1.53)     | 1.58<br>(0.99-2.52) | 2.19<br>(1.33-3.62)            |                                             |
|                         | Incidence<br>Rate* | 5.99                          | 7.12                    | 8.61                | 17.12                          |                                             |
| Measurable<br>hs-cTnT   | HR+<br>(95% CI)    | 1.69<br>(1.14-2.52)           | 1.97<br>(1.36-2.87)     | 2.30<br>(1.56-3.39) | 4.16<br>(2.82-6.15)            | <0.001                                      |

|                 |           |              |             |              |              |       |
|-----------------|-----------|--------------|-------------|--------------|--------------|-------|
|                 | Incidence | 26.57        | 29.20       | 32.70        | 40.55        |       |
|                 | Rate*     |              |             |              |              |       |
| High<br>hs-cTnT |           |              |             |              |              | <0.05 |
|                 | HR†       | 6.10         | 5.58        | 6.76         | 9.20         |       |
|                 | (95% CI)  | (3.61-10.32) | (3.58-8.70) | (4.29-10.65) | (5.67-14.93) |       |

Crude incidence rates and adjusted hazard ratios for incident HF associated with higher BMI within each hs-cTnT category. Note that each 5-point higher increment of BMI was associated with increased HF risk among individuals with undetectable ( $p<0.001$ ), measurable ( $p<0.001$ ) and high hs-cTnT ( $p<0.05$ ).

\*Incident HF events per 1,000 person-years

†Adjusted for age, sex, race, smoking status, diabetes mellitus, hypertension, LDL-C, HDL-C, triglycerides, alcohol intake, NT-proBNP and estimated GFR
